# Supplementary material
Source: PubMed Central journal article supplement (PMC2790813)
Supplement: NIHMS81169-supplement-contents_txt.pdf [file NIHMS81169-supplement-contents_txt.pdf]

This BioMEMS device uses PDMS microfluidic tunnels to permit long-term and enhanced electrical recordings of action potentials from isolated axons with high spatial selectivity to monitor changes in conduction velocity.
